1 **Dietary protein mediates terminal investment in egg quantity or quality following**  
2 **bacterial gut infection in *Drosophila***

3  
4

5 Ali L. Hudson<sup>1</sup>, Joshua P. Moatt<sup>1</sup> & Pedro F. Vale<sup>1</sup>

6

7 1. Institute of Evolutionary Biology, School of Biological Sciences, University of  
8 Edinburgh

9 Edinburgh EH9 3FL

10

11 [Ali.hudson@ed.ac.uk](mailto:Ali.hudson@ed.ac.uk)

12 [Josh.moatt@ed.ac.uk](mailto:Josh.moatt@ed.ac.uk)

13 [Pedro.vale@ed.ac.uk](mailto:Pedro.vale@ed.ac.uk)

14

15

## 16 **Abstract**

17 Organisms have evolved a range of behavioural and physiological responses which minimize  
18 the impact of infection on fitness. When future reproductive potential is threatened, for  
19 example, as a result of pathogenic infection, the terminal investment hypothesis predicts  
20 that individuals will respond by investing preferentially in current reproduction. Terminal  
21 investment involves reallocating resources to current reproductive effort, so it is likely to be  
22 influenced by the quantity and quality of resources acquired through diet. Dietary protein  
23 specifically has been shown to impact both immunity and reproductive output in a range of  
24 organisms, but its impact on terminal investment during infection is unclear. We tested the  
25 effect of dietary protein on terminal investment in the fruit fly *Drosophila melanogaster*  
26 following oral exposure to the opportunist bacterial pathogen *Pseudomonas aeruginosa*. Oral  
27 exposure to bacteria triggered an increase in reproductive investment, but we find that the  
28 nature of the terminal investment strategy depended on the level of dietary protein. Flies  
29 feeding on a high protein diet increased the number of eggs laid when exposed to *P.*  
30 *aeruginosa*, while flies fed an isocaloric, lower protein diet did not increase the number of eggs  
31 laid but instead showed an increase in egg-to-adult viability following infection. We discuss  
32 the importance of considering diet and natural routes of infection when measuring non-  
33 immunological defenses.

34

35

36 Key-words: terminal investment; oral infection; dietary protein; fecundity compensation;  
37 *Drosophila melanogaster*, *Pseudomonas aeruginosa*

## 38 Introduction

39 The life histories of all organisms are constrained by trade-offs, arising from the differential  
40 allocation of limited resources (Kirkwood, 1977; Stearns, 1992). For example, investing in  
41 current reproduction may be costly if it reduces the resources available for other somatic  
42 functions, such as growth, tissue repair or mounting an immune response (Schwenke *et al.*,  
43 2016). The optimal resource allocation strategy will vary according to individual condition and  
44 environmental context, and a key trade-off is that between current and future reproduction  
45 (Williams, 1966; Holliday, 1989). When future reproductive potential is threatened, for  
46 example, as a result of pathogenic infection, reserving resources by spreading reproductive  
47 investment over multiple breeding attempts may result in reduced fitness relative to investing  
48 resources in current reproduction. The terminal investment hypothesis predicts  
49 that individuals will respond to such cues of impending sterility or mortality by increasing  
50 investment in current reproduction (Minchella & Loverde, 1981; Clutton-Brock, 1984; Thornhill  
51 *et al.*, 1986).

52 Terminal investment may take the form of increased early reproductive output, early  
53 maturation, or an increase in other forms of reproductive investment such as mating effort or  
54 parental care (Duffield *et al.*, 2017). Terminal investment has been observed in diverse animal  
55 and plant taxa in response to a wide range of cues (reviewed in Duffield *et al.*, 2017), including  
56 resource availability (Kim & Donohue, 2011), injury (Morrow *et al.*, 2003) non-pathogenic  
57 immune stimulation (Bonneaud *et al.*, 2004; Jacot *et al.*, 2004; Hanssen, 2006) and infection  
58 by lethal (Waldman *et al.*, 2016; Gupta *et al.*, 2017a), sub-lethal (Roznik *et al.*, 2015; Gupta *et al.*,  
59 2017a), or sterilizing (Minchella & Loverde, 1981; Chadwick & Little, 2005; Vale & Little,  
60 2012) pathogens. Because it increases host fitness during infection without directly reducing  
61 pathogen burdens, terminal investment acts to increase host disease tolerance, and has been  
62 described as an adaptive, non-immunological defense from infection (Parker *et al.*, 2011;  
63 Kutzer & Armitage, 2016a).

64 Terminal investment involves a reallocation of resources from other somatic functions to  
65 current reproductive effort, and thus is likely to be influenced by the quantity and quality of  
66 resources acquired through diet. Diet is known to affect both fecundity and immunity across  
67 a wide range of species (Lochmiller & Deerenberg, 2000; Field *et al.*, 2002; Lee *et al.*, 2008;  
68 Maklakov *et al.*, 2008; Jensen *et al.*, 2015; Schwenke *et al.*, 2016). Protein in particular is a  
69 key resource for growth, development and reproduction (Mirth *et al.*, 2019). Fruit flies  
70 (*Drosophila melanogaster*) produce more eggs on protein rich diets and these eggs are more  
71 likely to be viable (Drummond-Barbosa & Spradling, 2001; Lee *et al.*, 2008; Lihoreau *et al.*,  
72 2016; Mirth *et al.*, 2019). Egg protein content is influenced directly by dietary protein (Kutzer

73 & Armitage, 2016b; Mirth *et al.*, 2019) and has been shown to correlate with hatchling size  
74 (Stahlschmidt *et al.*, 2013). Egg protein content may additionally be subject to trade-offs  
75 against the immune response, as evidenced by immune challenged female mosquitoes  
76 (*Anopheles gambiae*) laying eggs with lower protein content (Ahmed *et al.*, 2002). Despite  
77 these findings, few studies have investigated how host diet or specific nutrients may influence  
78 the extent of terminal investment (Jacot *et al.*, 2004; Krams *et al.*, 2015).

79 In the present study we tested the effect of dietary protein on terminal investment in the fruit  
80 fly *D. melanogaster*. A previous study of systemic infection in *Drosophila* reared flies on either  
81 a standard or reduced protein diet but did not find any evidence for increased reproductive  
82 output following infection on either diet (Kutzer & Armitage, 2016c). Due to the expected trade-  
83 off between reproduction and immunity, and the elevated protein requirements of oogenesis,  
84 we hypothesized that terminal investment would be more likely to occur on a high protein diet.  
85 We exposed female flies orally to the bacterial pathogen *Pseudomonas aeruginosa* in order  
86 to establish an enteric infection. We placed flies on a standard cornmeal-sugar-yeast Lewis  
87 diet (Lewis, 2014) or on a modified, isocaloric, high protein diet, and measured reproductive  
88 outputs that allowed us to assess the role of dietary protein on the reproductive quantity (the  
89 number of eggs laid) and also on the quality of those eggs (the number of eggs that eclosed  
90 as viable offspring).

91

## 92 **Methods**

93

### 94 **Fly lines and rearing conditions**

95 We used ten lines from the *Drosophila* Genetic Reference Panel (DGRP): RAL-59, RAL-75,  
96 RAL-138, RAL-373, RAL-379, RAL-380, RAL-502, RAL-738, RAL-765 and RAL-818 (Mackay  
97 *et al.*, 2012). All lines were previously cleared of *Wolbachia* infection, which is known to confer  
98 protection against enteric bacterial infection by *P. aeruginosa* (Gupta *et al.*, 2017b). Prior to  
99 the experiment, all lines were housed in plastic vials ( $\Phi$  25mm, height 95mm) plugged with  
100 non-absorbent cotton wool on a standard undyed Lewis diet (Lewis, 2014) and maintained  
101 under identical conditions of 12:12 light:dark regimes at 25°C for minimum 3 generations.  
102 Stocks were kept at 10-20 adult flies per vial and allowed to lay for 24 hours before being  
103 removed. Flies laid for the experimental generations were density controlled by adding 15  
104 female and 2 male flies to each vial for 24 hours. Eggs laid during this period were allowed to  
105 develop for 14 days at 25°C. The resulting adults were lightly sedated with CO<sub>2</sub>, 14 days after  
106 the parents had been introduced to lay eggs. Two density-controlled vials were set up for each  
107 line by placing 15 females and 2 males on standard Lewis medium, where they were kept for  
108 24 hours ( $\pm$ 2 hours) to ensure maturity and mating had occurred prior to the experiment.

109

### 110 **Diet treatments and experimental setup**

111 Two diets of differing protein levels were used (Table S1). A standard Lewis diet of roughly  
112 14% protein was chosen, as this is frequently employed in laboratory experiments involving  
113 *Drosophila*. The second diet was a Lewis diet modified to contain approximately double the  
114 amount ( $\sim$ 31%) protein, as it was shown to induce significantly higher egg laying in *Drosophila*  
115 (Lee *et al.*, 2008; Jensen *et al.*, 2015). Protein quantity was manipulated by increasing the  
116 yeast component, while carbohydrate was reduced by decreasing the sugar to maintain an  
117 approximately isocaloric diet. Both diets were dyed with Brilliant Blue FCF E133 (Sigma) to  
118 increase contrast between the eggs and the food during egg counts. The experiment used a  
119 2 $\times$ 2 $\times$ 10 fully cross-factored design, with two levels of infection status (infected and  
120 uninfected), two diets (normal 7% and high 14%), and ten fly lines. Ten, individually housed,  
121 replicate flies from each line were subject to each treatment. This resulted in a total of 400  
122 flies, 40 per line, being used, with 200 flies for each level of the factors diet and infection, and  
123 100 flies for each diet-infection status combination. The experiment was split evenly over two  
124 blocks, with 5 replicates per line per treatment group in each block.

### 125 ***Pseudomonas aeruginosa* culture and oral infection protocol**

126 *P. aeruginosa* reference strain PA14 is a gram-negative bacterium known to cause mortality  
127 in a range of species, including *D. melanogaster* (Apidianakis & Rahme, 2009; De Soyza *et*

128 *al.*, 2013). Bacterial growth for fly oral infection was carried out as described in previously  
129 (Siva-Jothy *et al.*, 2018). Briefly, a 200 $\mu$ l stock culture of PA14 (optical density at 600nm,  
130 OD<sub>600</sub>=1) frozen at -80°C in 25% glycerol was introduced to a 50ml falcon tube containing  
131 20ml of sterile LB broth (Fisher Scientific BP1426), and shaken overnight at 140rpm and 30°C.  
132 To produce the large volume and high concentration of bacteria needed for infection,  
133 subcultures were taken from the overnight cultures by introducing 3ml of culture into 297ml of  
134 sterile LB broth. These were shaken at 140rpm for 7-8 hours at 37°C, and monitored until they  
135 reached OD<sub>600</sub>=0.6 to 0.8, indicative of the exponential growth phase. Each subculture was  
136 divided into 50ml falcon tubes, containing 30ml of subculture each and centrifuged at 2,500xg  
137 at 4°C for 20 minutes to precipitate the bacteria. The majority of the supernatant was  
138 discarded, except for the final ~2ml, in which the pellet was resuspended by vortexing at a  
139 high speed for 2-3 minutes. These suspensions were transferred to a single falcon tube which  
140 was centrifuged again as above, and the supernatant discarded. The pellet from each  
141 subculture was resuspended in 5% sucrose solution to achieve an OD<sub>600</sub>=25.

142 For oral infection, flies were starved for 7-8 hours prior to infection by tipping into foodless  
143 vials, bunged with absorbent cotton wool moistened with distilled water to prevent dehydration.  
144 In the 24 hours preceding the infection protocol, 500 $\mu$ l of sugar agar (20g of agar powder and  
145 84g of brown sugar, dissolved in 1l distilled H<sub>2</sub>O and heated) was added to the lid of a 7ml  
146 Bijou tube (Fisher Scientific 129A). Once firm, a 20mm filter paper disc was placed on the  
147 agar, and the bijous were sealed for overnight storage at 4°C, and returned to room  
148 temperature before use. Immediately before infection, 80 $\mu$ l of the PA14 suspension (OD<sub>600</sub>=25  
149 as described above), or 5% sucrose for the control, was pipetted onto the filter disc and  
150 allowed to dry for 20 minutes. The starved flies were lightly sedated with CO<sub>2</sub>, transferred  
151 individually into a bijou and kept overnight (~16 hours) at 25°C to ingest bacteria. They were  
152 then tipped onto their designated diets. To confirm infection and the absence of contamination  
153 of the control flies, we prepared 20 additional flies from each line and quantified bacterial  
154 growth at the end of the infection period. These flies were placed individually into 1.5ml  
155 Eppendorf tubes and surface sterilized for 30-60 seconds in 100 $\mu$ l 70% ethanol, then washed  
156 twice in 200 $\mu$ l of distilled water. 5 $\mu$ l of the second wash was plated on an LB agar plate (Fisher  
157 Scientific BP1426) and another 5  $\mu$ l on *Pseudomonas* Isolation Medium (PIM) (Sigma-Aldrich  
158 P2102) plate, to confirm surface sterilization. The flies were then placed in 1.0ml of Phosphate  
159 Buffer Solution (PBS) and microcentrifuged at 5000rpm for 1 minute before the PBS was  
160 removed and the fly homogenized in 200 $\mu$ l of LB broth using a micropestle and handheld  
161 motor. This homogenate was plated on sterile PIM agar, and incubated at 29°C for 2-3 days  
162 to confirm infection. This confirmed infection in all PA14 treated flies tested, and found no  
163 evidence of contamination of control flies.

164 **Fecundity and survival following infection**

165 Following infection, the flies were housed individually on either the standard Lewis diet, or the  
166 modified higher protein diet (described above), and maintained at 25°C on a 12:12 light:dark  
167 cycle. All flies were tipped onto fresh food of the same diet every day for seven days, when  
168 their survival was recorded, and the number of eggs laid counted under a microscope. Survival  
169 was recorded for an additional 3 days after egg counts concluded. To assess egg-to-adult  
170 viability, eggs laid on days 1-3, 5 and 7 were incubated for 16 days at 25°C, and the number  
171 of eclosed offspring were counted.

172 **Analysis**

173 Analysis and plots were performed using R version 3.4.3 (Core Team, 2017) using the  
174 packages *lme4* (Bates *et al.*, 2015) and *survival* (Therneau, 2015). All models include the  
175 random effect of individual nested within line to account for repeated measures across  
176 individuals and lines. Daily egg production and number of eclosed offspring were analyzed via  
177 generalized linear mixed effects models (GLME). Models fitted diet, infection status, day and  
178 their interactions, alongside block as categorical fixed effects. To control for overdispersion  
179 within the data, row ID was included as a random effect in both models. Egg-to-adult viability  
180 was analysed using a binomial GLME, with the number of eggs that eclosed and the number  
181 which did not eclose bound and treated as the response variable, i.e. the proportion of eggs  
182 eclosing. Diet, infection status, day and their interactions were treated as fixed effects as well  
183 as block. To account for potential density effects, the total number of eggs present in the vial  
184 was included as a random effect. To understand any life-history changes induced solely by  
185 diet, infection and its interactions were dropped and all models were rerun on control flies only.  
186 Full R code for all analysis is available in *supplementary materials / DRYAD*.

187

188

189

## 190 **Results**

### 191 **Life-history changes due to dietary protein in uninfected flies**

192 Before examining the effects of dietary protein on terminal investment, it is important to assess  
193 its effects on reproductive output in healthy flies. As anticipated, flies reared on the high protein  
194 diet produced more eggs than those on the standard diet (Figure 1), and these eggs showed  
195 higher viability (Figure 2), resulting in more eclosed adult offspring per fly each day under high  
196 protein compared to on the standard diet (Figure 3; Table 1). The number of eggs laid each  
197 day increased over the course of the experiment when flies were reared on the high protein  
198 diet, but this increase was not as evident under the standard protein diet (Figure 1, light blue  
199 bars; Table 1, 'Diet x Day' interaction). Diet-dependent temporal dynamics were also evident  
200 for the number of viable offspring (Figure 2; Table 1, 'Diet x Day' interaction). We found that  
201 the genetic background of flies contributed significantly to the variance in both the number of  
202 eggs laid and in the proportion of these eggs that resulted in the eclosion of viable offspring  
203 (Table 1 "line" effect; Figures S1-S3).

204

### 205 **Increased oviposition in infected flies on high protein diet**

206 Flies exposed orally to *Pseudomonas aeruginosa* experienced significantly higher mortality  
207 than control flies and the rate of mortality did not differ with diet (Figure S4). Most mortality  
208 (approximately 40%) occurred within 1-3 days following oral exposure, reaching 50% by the  
209 end of the experiment. The genetic background of the flies explained a significant proportion  
210 of variance in the number of eggs laid (Table 2 "line" effect; Figures S1). Flies that were  
211 exposed to *P.aeruginosa* laid significantly more eggs than those exposed to a control solution,  
212 but only when fed the high protein diet (Figure 1; Table 2, Model 1 'Diet x Infection Status').  
213 Averaged over all days, exposed flies on the high protein diet laid 9.3 eggs per day, compared  
214 to 7.6 laid per day by control flies on the same diet.

215

### 216 **Egg viability is increased in infected flies, regardless of diet**

217 While increasing the number of eggs following exposure to a pathogen is a clear indication of  
218 terminal investment, more eggs will only translate into increased fitness if they are capable of  
219 developing into viable adult offspring. As expected, infected flies on the high protein diet  
220 produced a greater number of viable offspring than those on the standard diet (Figure 3; Table  
221 2, Model 2, 'Diet x Infection'), reflecting their higher egg laying. However, the higher number  
222 of viable adult offspring from infected flies was not only a result of increased egg laying, but  
223 also due to an increase in egg-to-adult viability, which was higher in infected flies relative to  
224 control flies. Flies on the standard diet showed a larger increase in viability following infection  
225 than those on the high protein diet, peaking 2 days post-infection. Both the total number of



226 eclosed offspring and the egg-to-adult viability differed between fly lines (Table 1 “line” effect;  
227 Figures S2-S3).

228

## 229 **Discussion**

230

231 Organisms have evolved an array of strategies to minimize the impact of infection on fitness,  
232 including behavioral avoidance of infection (Curtis, 2014; Vale *et al.*, 2018), and mechanisms  
233 that either mediate pathogen clearance or that minimize the damage caused by pathogen  
234 exploitation (Gupta & Vale, 2017; Soares *et al.*, 2017; Lissner & Schneider, 2018). These  
235 defense mechanisms are likely to be costly to maintain and deploy (Moret & Schmid-Hempel,  
236 2000; Armitage *et al.*, 2003; Bonneaud *et al.*, 2003; Labbé *et al.*, 2010; Duncan *et al.*, 2011;  
237 Auld *et al.*, 2013; Susi & Laine, 2015; Vale *et al.*, 2015), and therefore rely heavily on the  
238 acquisition of dietary nutrients, their transformation into energy resources, and the appropriate  
239 allocation of these resources to different life-history traits (Schwenke *et al.*, 2016).

240 We investigated the effect of dietary protein on terminal investment in response to infection, a  
241 form of non-immunological defense that mitigates the potential fitness losses of infection by  
242 increasing reproductive investment (Parker *et al.*, 2011; Kutzer & Armitage, 2016a). We found  
243 that oral infection by *P. aeruginosa* was sufficient to trigger a shift in reproductive investment,  
244 recapitulating similar increases in reproductive output in *D. melanogaster* following sub-lethal  
245 viral infections (Gupta *et al.*, 2017a). However, here we observed that the nature of the  
246 terminal investment strategy depended on the availability of dietary protein. Flies feeding on  
247 a high protein diet invested terminally in the quantity of eggs, while flies fed a lower protein  
248 diet increased investment in the quality (viability) but not quantity of their eggs.

249 While there is a considerable amount of work showing that protein levels affect reproductive  
250 output and immunity (reviewed in Schwenke *et al.*, 2016), the role of diet on the ability to  
251 terminally invest following exposure to pathogens has received less attention. In one study,  
252 diet-restricted male mealworm beetles (*Tenebrio molitor*) were found to invest terminally in  
253 attractive sex odours at the expense of a resistant encapsulation response to a nylon implant  
254 (Krams *et al.*, 2015a). In other work, reduced investment in mate calling by male crickets  
255 injected with bacterial lipopolysaccharides was alleviated by food supplementation (Jacot *et al.*  
256 *et al.*, 2004), suggesting that reproductive investment following infection can be augmented by  
257 dietary supplementation.

258 In *Drosophila*, both the quantity of protein per egg and the quantity of eggs produced are  
259 influenced by dietary protein availability (Mirth *et al.*, 2019). Female *D. melanogaster* typically  
260 weigh 800-1100µg (wet weight, Jumbo-Lucioni *et al.*, 2010), and lay eggs containing

261 approximately 10-12 $\mu$ g of protein each (Kutzer and Armitage, 2016). The highest laying fly in  
262 this study produced 172 eggs over 7 days, representing about 2000 $\mu$ g of protein invested in  
263 egg production, or ~200 % of the fly's wet weight, which underlines the importance of dietary  
264 protein for oogenesis. In the current experiment, protein was clearly the factor limiting  
265 investment in increased egg production, since in line with the results of other studies  
266 (Drummond-Barbosa & Spradling, 2001; Lee *et al.*, 2008; Kutzer & Armitage, 2016c), flies on  
267 the elevated protein diet produced more eggs than flies on the standard medium. The lack of  
268 terminal investment in the number of eggs under the lower level of protein may therefore be a  
269 result of the necessary protein being unavailable on the standard diet. It is therefore plausible  
270 that other studies where terminal investment has not been observed were a result of  
271 insufficient protein being available to terminally invest in increased reproduction (e.g Kutzer &  
272 Armitage, 2016b).

273 Investing in increased egg production is one way organisms can improve their number of  
274 surviving offspring, but another is to ensure that the offspring produced are viable. We took  
275 egg-to-adult viability to reflect egg quality, counting both the number of eggs laid by a fly on a  
276 given day, and the number of those eggs which eclosed to adults within 16 days. The greatest  
277 increase in egg-to-adult viability following infection was observed in eggs laid by flies on the  
278 standard diet, whereas those laid by infected flies on the standard diet were more numerous  
279 but not more viable than those of uninfected controls. Previous work has found that flies raised  
280 on a poor diet produce heavier eggs, and produce offspring that themselves are more resistant  
281 to poor nutrition than those of flies raised on a standard diet (Vijendravarma *et al.*, 2010). This  
282 suggests that flies may be subject to a protein allocation trade-off between per-egg protein  
283 allocation, and number of eggs produced, and that payoffs of this trade-off vary according to  
284 the quality of food available. In a situation of low protein availability, it may be better to invest  
285 what little protein is available in a smaller number of eggs to improve offspring viability.

286 The precise mechanisms by which changes in diet affect reproductive traits following infection  
287 are difficult to disentangle. Dietary protein provides both the raw material for egg production,  
288 as well as influencing complex signalling pathways which determine investment in egg  
289 production (Mirth, Alvez & Piper, 2019 ) Our results showed that flies on the standard diet  
290 could produce eggs with higher viability but did not invest in doing so in the absence of  
291 infection. This suggests that raw materials were available to produce more viable eggs, but  
292 signalling pathways controlling investment in egg quality were influenced by limited protein  
293 availability to reduce this investment. Recent research has highlighted the roles played by  
294 juvenile hormone and ecdysone levels as well as insulin signalling in regulating egg production  
295 in response to nutritional states (Mirth *et al.* 2019). Additionally, bacterial derived  
296 peptidoglycans have been shown to activate NF-kB signalling pathways in octopaminergic

297 neurons, resulting in changes in egg laying (Kurz *et al.*, 2017). Interactions between these  
298 pathways signalling nutritional and infection status may therefore underlie protein-mediated  
299 plasticity in terminal investment. Future work should investigate these interactions and attempt  
300 to characterise their potential as a mechanism by which organisms can pursue optimal  
301 strategies under differing nutrient availabilities.

302 Compared to previous work on terminal investment, particularly in insect systems, a unique  
303 aspect of this study was the infection method. We chose to establish a gut infection because  
304 we were investigating an evolved adaptive response to infection, and oral infection by  
305 *Pseudomonas* is believed to be more common in the wild than infection via septic route  
306 employed in many other studies (Jacot *et al.*, 2004; Reaney & Knell, 2010; Duffield *et al.*,  
307 2017). Other work has shown that the evolutionary response of *D. melanogaster* to  
308 *Pseudomonas* infection is specific to the route of infection (Martins *et al.*, 2013), and that  
309 antibacterial protection by *Wolbachia* occurs during oral but not systemic infections (Gupta *et*  
310 *al.*, 2017b). These results suggest that selection to cope with oral *Pseudomonas* infection has  
311 been stronger, which may explain why previous works which often employed systemic  
312 infections have not detected a similar terminal investment response (Kutzer & Armitage,  
313 2016c).

314 In summary, we find that dietary protein can mediate the terminal investment strategy of flies  
315 following infection. This result places our current understanding of non-immunological defence  
316 from infection in an important ecological context, as environments where protein availability is  
317 variable may select for multiple resource-dependent strategies for limiting the impact of  
318 infection. Further research into the wider consequences of this plasticity on the population  
319 ecology of host species during infection, and the underlying physiological mechanisms of  
320 these responses is now needed. Combined, this will result in a clearer understanding of the  
321 broader ecological and evolutionary implications of fluctuating resource availability in natural  
322 populations.

### 323 **Acknowledgements**

324 We are grateful to Katy Monteith and Jay-Russell Dennis for technical assistance, Angela Reid  
325 and Lucinda Rowe for preparation of all fly media and Eevi Savola for sharing information on  
326 diet composition. We also thank Jenny Regan, Darren Obbard, Craig Walling and respective  
327 lab members for constructive suggestions. P. Vale is grateful to funding and support from a  
328 Chancellor's fellowship (University of Edinburgh) and a Branco Weiss fellowship from Society  
329 in Science.

330

## 331 References

- 332 Ahmed, A.M., Baggott, S.L., Maingon, R. & Hurd, H. 2002. The costs of mounting an immune response are  
333 reflected in the reproductive fitness of the mosquito *Anopheles gambiae*. **3**: 371–377.
- 334 Apidianakis, Y. & Rahme, L.G. 2009. *Drosophila melanogaster* as a model host for studying *Pseudomonas*  
335 *aeruginosa* infection. *Nat. Protoc.* **4**: 1285–1294.
- 336 Armitage, S. a. O., Thompson, J.J.W., Rolff, J. & Siva-Jothy, M.T. 2003. Examining costs of induced and  
337 constitutive immune investment in *Tenebrio molitor*. *J. Evol. Biol.* **16**: 1038–1044.
- 338 Auld, S.K.J.R., Penczykowski, R.M., Ochs, J.H., Grippi, D.C., Hall, S.R. & Duffy, M.A. 2013. Variation in costs of  
339 parasite resistance among natural host populations. *J. Evol. Biol.* **26**: 2479–2486.
- 340 Bates, D., Mächler, M., Bolker, B. & Walker, S. 2015. Fitting Linear Mixed-Effects Models Using lme4. *J. Stat.*  
341 *Softw.* **67**.
- 342 Bonneaud, C., Mazuc, J., Chastel, O., Westerdahl, H. & Sorci, G. 2004. Terminal Investment Induced by Immune  
343 Challenge and Fitness Traits Associated with Major Histocompatibility Complex in the House Sparrow.  
344 *Evolution* **58**: 2823–2830.
- 345 Bonneaud, C., Mazuc, J., Gonzalez, G., Haussy, C., Chastel, O., Faivre, B., *et al.* 2003. Assessing the Cost of  
346 Mounting an Immune Response. *Am. Nat.* **161**: 367–379.
- 347 Chadwick, W. & Little, T.J. 2005. A parasite-mediated life-history shift in *Daphnia magna*. *Proc. R. Soc. Lond. B*  
348 *Biol. Sci.* **272**: 505–509.
- 349 Clutton-Brock, T.H. 1984. Reproductive Effort and Terminal Investment in Iteroparous Animals. *Am. Nat.* **123**:  
350 212–229.
- 351 Core Team, R. 2017. R: A language and environment for statistical computing. Foundation for Statistical  
352 Computing.
- 353 Curtis, V.A. 2014. Infection-avoidance behaviour in humans and other animals. *Trends Immunol.* **35**: 457–464.
- 354 De Soyza, A., Hall, A.J., Mahenthalingam, E., Drevinek, P., Kaca, W., Drulis-Kawa, Z., *et al.* 2013. Developing  
355 an international *Pseudomonas aeruginosa* reference panel. *MicrobiologyOpen* **2**: 1010–1023.
- 356 Drummond-Barbosa, D. & Spradling, A.C. 2001. Stem cells and their progeny respond to nutritional changes  
357 during *Drosophila* oogenesis. *Dev. Biol.* **231**: 265–278.
- 358 Duffield, K.R., Bowers, E.K., Sakaluk, S.K. & Sadd, B.M. 2017. A dynamic threshold model for terminal  
359 investment. *Behav. Ecol. Sociobiol.* **71**.
- 360 Duncan, A.B., Fellous, S. & Kaltz, O. 2011. Reverse Evolution: Selection Against Costly Resistance in Disease-  
361 Free Microcosm Populations of *Paramecium Caudatum*. *Evolution* **65**: 3462–3474.
- 362 Field, C.J., Johnson, I.R. & Schley, P.D. 2002. Nutrients and their role in host resistance to infection. *J. Leukoc.*  
363 *Biol.* **71**: 16–32.
- 364 Gupta, V., Stewart, C.O., Rund, S.S.C., Monteith, K. & Vale, P.F. 2017a. Costs and benefits of sublethal  
365 *Drosophila* C virus infection. *J. Evol. Biol.* **30**: 1325–1335.
- 366 Gupta, V. & Vale, P.F. 2017. Nonlinear disease tolerance curves reveal distinct components of host responses to  
367 viral infection. *R. Soc. Open Sci.* **4**: 170342.
- 368 Gupta, V., Vasanthakrishnan, R.B., Siva-Jothy, J., Monteith, K.M., Brown, S.P. & Vale, P.F. 2017b. The route of  
369 infection determines *Wolbachia* antibacterial protection in *Drosophila*. *Proc R Soc B* **284**: 20170809.
- 370 Hanssen, S.A. 2006. COSTS OF AN IMMUNE CHALLENGE AND TERMINAL INVESTMENT IN A LONG-LIVED  
371 BIRD. *Ecology* **87**: 2440–2446.
- 372 Holliday, R. 1989. Food, reproduction and longevity: is the extended lifespan of calorie-restricted animals an  
373 evolutionary adaptation? *BioEssays News Rev. Mol. Cell. Dev. Biol.* **10**: 125–127.

- 374 Jacot, A., Scheuber, H. & Brinkhof, M.W.G. 2004. Costs of an induced immune response on sexual display and  
375 longevity in field crickets. *Evol. Int. J. Org. Evol.* **58**: 2280–6.
- 376 Jensen, K., McClure, C., Priest, N.K. & Hunt, J. 2015. Sex-specific effects of protein and carbohydrate intake on  
377 reproduction but not lifespan in *Drosophila melanogaster*. *Aging Cell* **14**: 605–615.
- 378 Kim, E. & Donohue, K. 2011. Demographic, developmental and life-history variation across altitude in *Erysimum*  
379 *capitatum*. *J. Ecol.* **99**: 1237–1249.
- 380 Kirkwood, T.B. 1977. Evolution of ageing. *Nature* **270**: 301–304.
- 381 Krams, I.A., Krama, T., Moore, F.R., Rantala, M.J., Mänd, R., Mierauskas, P., *et al.* 2015. Resource availability  
382 as a proxy for terminal investment in a beetle. *Oecologia* **178**: 339–345.
- 383 Kurz, C.L., Charroux, B., Chaduli, D., Viallat-Lieutaud, A. & Royet, J. 2017. Peptidoglycan sensing by  
384 octopaminergic neurons modulates *Drosophila* oviposition. *eLife* **6**: e21937.
- 385 Kutzer, M.A.M. & Armitage, S.A.O. 2016a. Maximising fitness in the face of parasites: a review of host tolerance.  
386 *Zool. Jena Ger.* **119**: 281–289.
- 387 Kutzer, M.A.M. & Armitage, S.A.O. 2016b. The effect of diet and time after bacterial infection on fecundity,  
388 resistance, and tolerance in *Drosophila melanogaster*. *Ecol. Evol.* **6**: 4229–4242.
- 389 Kutzer, M.A.M. & Armitage, S.A.O. 2016c. The effect of diet and time after bacterial infection on fecundity,  
390 resistance, and tolerance in *Drosophila melanogaster*. *Ecol. Evol.* **6**: 4229–4242.
- 391 Labbé, P., Vale, P. & Little, T. 2010. Successfully resisting a pathogen is rarely costly in *Daphnia magna*. *BMC*  
392 *Evol. Biol.* **10**: 355.
- 393 Lee, K.P., Simpson, S.J. & Wilson, K. 2008. Dietary protein-quality influences melanization and immune function  
394 in an insect. *Funct. Ecol.* **22**: 1052–1061.
- 395 Lewis, E. 2014. A new standard food medium. 1960 *Drosophila* Information Service. in. *Cold Spring Harb.*  
396 *Protoc.* **2014**: pdb.rec081414.
- 397 Lihoreau, M., Poissonnier, L., Isabel, G. & Dussutour, A. 2016. *Drosophila* females trade off good nutrition with  
398 high-quality oviposition sites when choosing foods. 2514–2524.
- 399 Lissner, M.M. & Schneider, D.S. 2018. The physiological basis of disease tolerance in insects. *Curr. Opin. Insect*  
400 *Sci.*, doi: 10.1016/j.cois.2018.09.004.
- 401 Lochmiller, R.L. & Deerenberg, C. 2000. Trade-offs in evolutionary immunology: just what is the cost of  
402 immunity? *Oikos* **88**: 87–98.
- 403 Mackay, T.F.C., Richards, S., Stone, E.A., Barbadilla, A., Ayroles, J.F., Zhu, D., *et al.* 2012. The *Drosophila*  
404 *melanogaster* Genetic Reference Panel. *Nature* **482**: 173.
- 405 Maklakov, A.A., Simpson, S.J., Zajitschek, F., Hall, M.D., Dessmann, J., Clissold, F., *et al.* 2008. Sex-specific  
406 fitness effects of nutrient intake on reproduction and lifespan. *Curr. Biol. CB* **18**: 1062–1066.
- 407 Martins, N.E., Faria, V.G., Teixeira, L., Magalhães, S. & Sucena, É. 2013. Host Adaptation Is Contingent upon  
408 the Infection Route Taken by Pathogens. *PLoS Pathog.* **9**.
- 409 Minchella, D.J. & Loverde, P.T. 1981. A Cost of Increased Early Reproductive Effort in the Snail *Biomphalaria*  
410 *glabrata*. *Am. Nat.* **118**: 876–881.
- 411 Mirth, C.K., Nogueira Alves, A. & Piper, M.D. 2019. Turning food into eggs: insights from nutritional biology and  
412 developmental physiology of *Drosophila*. *Curr. Opin. Insect Sci.* **31**: 49–57.
- 413 Moret, Y. & Schmid-Hempel, P. 2000. Survival for Immunity: The Price of Immune System Activation for  
414 Bumblebee Workers. *Science* **290**: 1166–1168.
- 415 Morrow, E.H., Arnqvist, G. & Pitnick, S. 2003. Adaptation versus pleiotropy: Why do males harm their mates?  
416 *Behav. Ecol.* **14**: 802–806.

- 417 Parker, B.J., Barribeau, S.M., Laughton, A.M., de Roode, J.C. & Gerardo, N.M. 2011. Non-immunological  
418 defense in an evolutionary framework. *Trends Ecol. Evol.* **26**: 242–248.
- 419 Reaney, L.T. & Knell, R.J. 2010. Immune activation but not male quality affects female current reproductive  
420 investment in a dung beetle. , doi: 10.1093/beheco/arq139.
- 421 Roznik, E.A., Sapsford, S.J., Pike, D.A., Schwarzkopf, L. & Alford, R.A. 2015. Condition-dependent reproductive  
422 effort in frogs infected by a widespread pathogen. *Proc. R. Soc. B Biol. Sci.* **282**.
- 423 Schwenke, R.A., Lazzaro, B.P. & Wolfner, M.F. 2016. Reproduction-Immunity Trade-Offs in Insects. *Annu. Rev.*  
424 *Entomol.* **61**: 239–256.
- 425 Siva-Jothy, J.A., Prakash, A., Vasanthakrishnan, R.B., Monteith, K.M. & Vale, P.F. 2018. Oral Bacterial Infection  
426 and Shedding in *Drosophila melanogaster*. *JoVE J. Vis. Exp.* e57676–e57676.
- 427 Soares, M.P., Teixeira, L. & Moita, L.F. 2017. Disease tolerance and immunity in host protection against  
428 infection. *Nat. Rev. Immunol.* **17**: 83–96.
- 429 Stahlschmidt, Z.R., Rollinson, N., Acker, M. & Adamo, S.A. 2013. Are all eggs created equal? Food availability  
430 and the fitness trade-off between reproduction and immunity. *Funct. Ecol.* **27**: 800–806.
- 431 Stearns, S.C. 1992. *The Evolution of Life Histories*, 1 edition. Oxford University Press, Oxford ; New York.
- 432 Susi, H. & Laine, A.-L. 2015. The effectiveness and costs of pathogen resistance strategies in a perennial plant.  
433 *J. Ecol.* **103**: 303–315.
- 434 Therneau, T.M. 2015. A Package for Survival Analysis in S (version 2.38).
- 435 Thornhill, J.A., Jones, J.T. & Kusel, J.R. 1986. Increased oviposition and growth in immature *Biomphalaria*  
436 *glabrata* after exposure to *Schistosoma mansoni*. *Parasitology* **93**: 443–450.
- 437 Vale, P. & Little, T. 2012. Fecundity compensation and tolerance to a sterilizing pathogen in *Daphnia*. *J. Evol.*  
438 *Biol.* **25**: 1888–1896.
- 439 Vale, P.F., Lafforgue, G., Gatchitch, F., Gardan, R., Moineau, S. & Gandon, S. 2015. Costs of CRISPR-Cas-  
440 mediated resistance in *Streptococcus thermophilus*. *Proc R Soc B* **282**: 20151270.
- 441 Vale, P.F., Siva-Jothy, J., Morrill, A. & Forbes, M. 2018. The influence of parasites on insect behavior. In: *Insect*  
442 *Behavior: from mechanisms to ecological and evolutionary consequences*, pp. 274–291. OUP Oxford.
- 443 Vijendravarma, R.K., Narasimha, S. & Kawecki, T.J. 2010. Effects of parental larval diet on egg size and  
444 offspring traits in *Drosophila*. *Biol. Lett.* **6**: 238–241.
- 445 Waldman, B., An, D. & Waldman, B. 2016. Enhanced call effort in Japanese tree frogs infected by amphibian  
446 chytrid fungus Enhanced call effort in Japanese tree frogs infected by amphibian chytrid fungus. 2016–  
447 2019.
- 448 Williams, G.C. 1966. Natural Selection, the Costs of Reproduction, and a Refinement of Lack’s Principle. *Am.*  
449 *Nat.* **100**: 687–690.
- 450

451

452

453 **Figures and Tables**

454

Table 1: Summarized models of control non-infected flies only.

| Term                    | Model A:    |         | Model B:         |         | Model C:               |         |
|-------------------------|-------------|---------|------------------|---------|------------------------|---------|
|                         | Eggs counts |         | Viable Offspring |         | Egg-to-Adult Viability |         |
|                         | $\chi^2$    | P=      | $\chi^2$         | P=      | $\chi^2$               | P=      |
| <b>Diet</b>             | 6.15        | 0.013   | 53.04            | <0.0001 | 63.67                  | <0.0001 |
| <b>Day</b>              | 276.98      | <0.0001 | 105.86           | <0.0001 | 10.74                  | 0.030   |
| <b>Line</b>             | 43.73       | <0.0001 | 0.29             | 0.59    | 394.64                 | <0.0001 |
| <b>No. of Eggs Laid</b> | -           | -       | -                | -       | 352.28                 | <0.0001 |
| <b>Block</b>            | 8.21        | 0.0042  | 1.53             | 0.22    | 3.57                   | 0.59    |
| <b>Diet × Day</b>       | 40.24       | <0.0001 | 15.14            | 0.0044  | 4.45                   | 0.35    |

455

456

457

458

Table 2: Summarized models for infected and control flies.

| Term                          | Model 1:    |         | Model 2:         |         | Model 3:               |         |
|-------------------------------|-------------|---------|------------------|---------|------------------------|---------|
|                               | Eggs counts |         | Viable Offspring |         | Egg-to-Adult Viability |         |
|                               | $\chi^2$    | P=      | $\chi^2$         | P=      | $\chi^2$               | P=      |
| <b>Diet</b>                   | 17.26       | <0.0001 | 69.87            | <0.0001 | 73.55                  | <0.0001 |
| <b>Infection</b>              | 0.0223      | 0.88    | 30.41            | <0.0001 | 40                     | <0.0001 |
| <b>Day</b>                    | 307.14      | <0.0001 | 123.6            | <0.0001 | 61.69                  | <0.0001 |
| <b>Line</b>                   | 71.7        | <0.0001 | 21.62            | <0.0001 | 98.92                  | <0.0001 |
| <b>No. of Eggs Laid</b>       | -           | -       | -                | -       | 29.79                  | <0.0001 |
| <b>Block</b>                  | 12.35       | <0.001  | 1.71             | 0.19    | 13.06                  | <0.001  |
| <b>Diet × Infection</b>       | 4.45        | 0.035   | 6.54             | 0.011   | 24.99                  | <0.0001 |
| <b>Diet × Day</b>             | 76.37       | <0.0001 | 43.22            | <0.0001 | 65.52                  | <0.0001 |
| <b>Infection × Day</b>        | 75.23       | <0.0001 | 37.12            | <0.0001 | 23.12                  | <0.001  |
| <b>Diet × Infection × Day</b> | 6.88        | 0.33    | 1.39             | 0.85    | 22.37                  | <0.001  |

459

460



461 **Figure 1 – Egg Production**

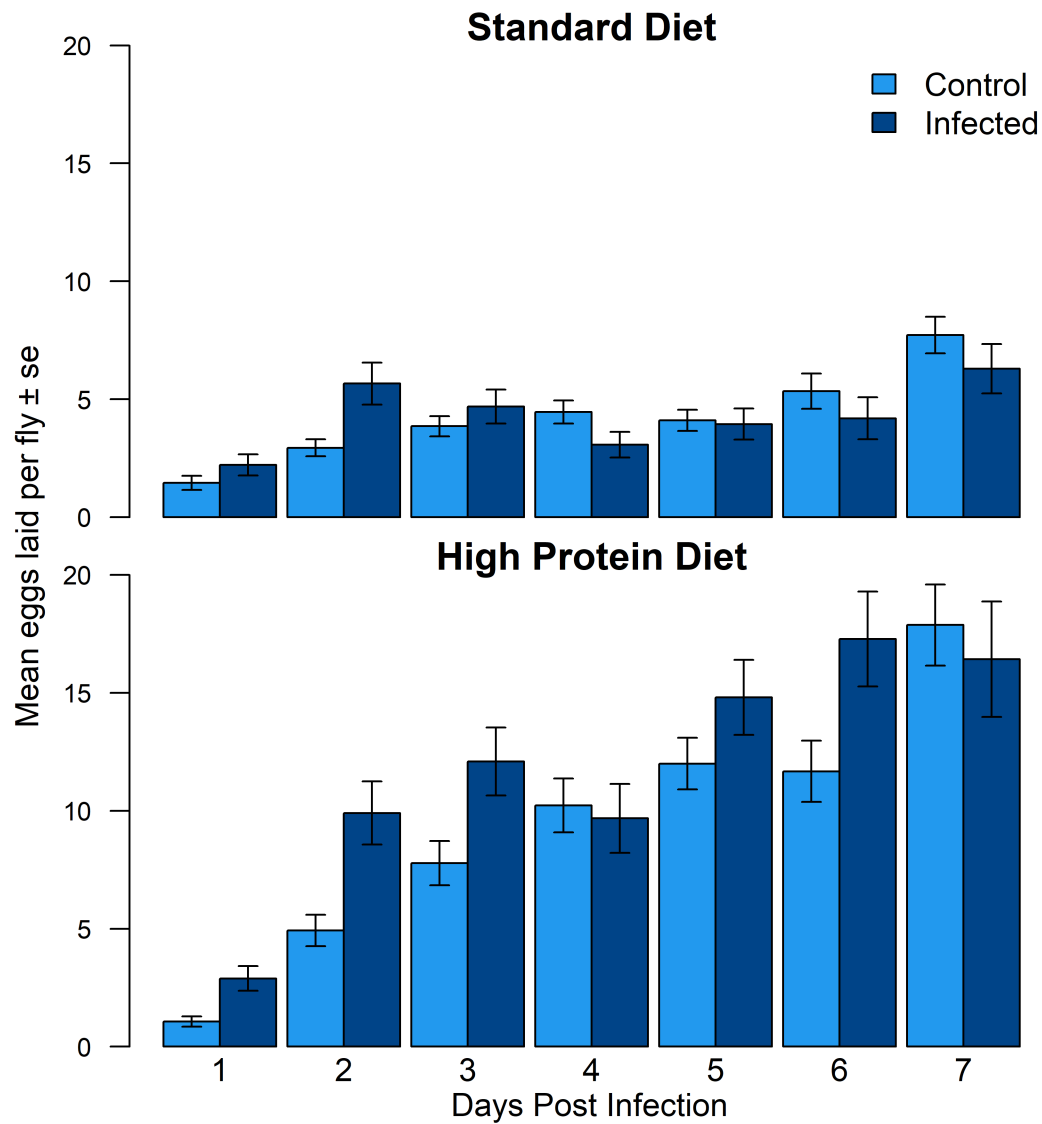

462

463 *Figure 1 Mean number of eggs laid per fly by control flies (light blue) and infected flies (dark*  
464 *blue) on the first seven days following infection on the standard Lewis diet (top) and the*  
465 *modified high protein diet (bottom).*

466

467 **Figure 2 – Total Viable Offspring**

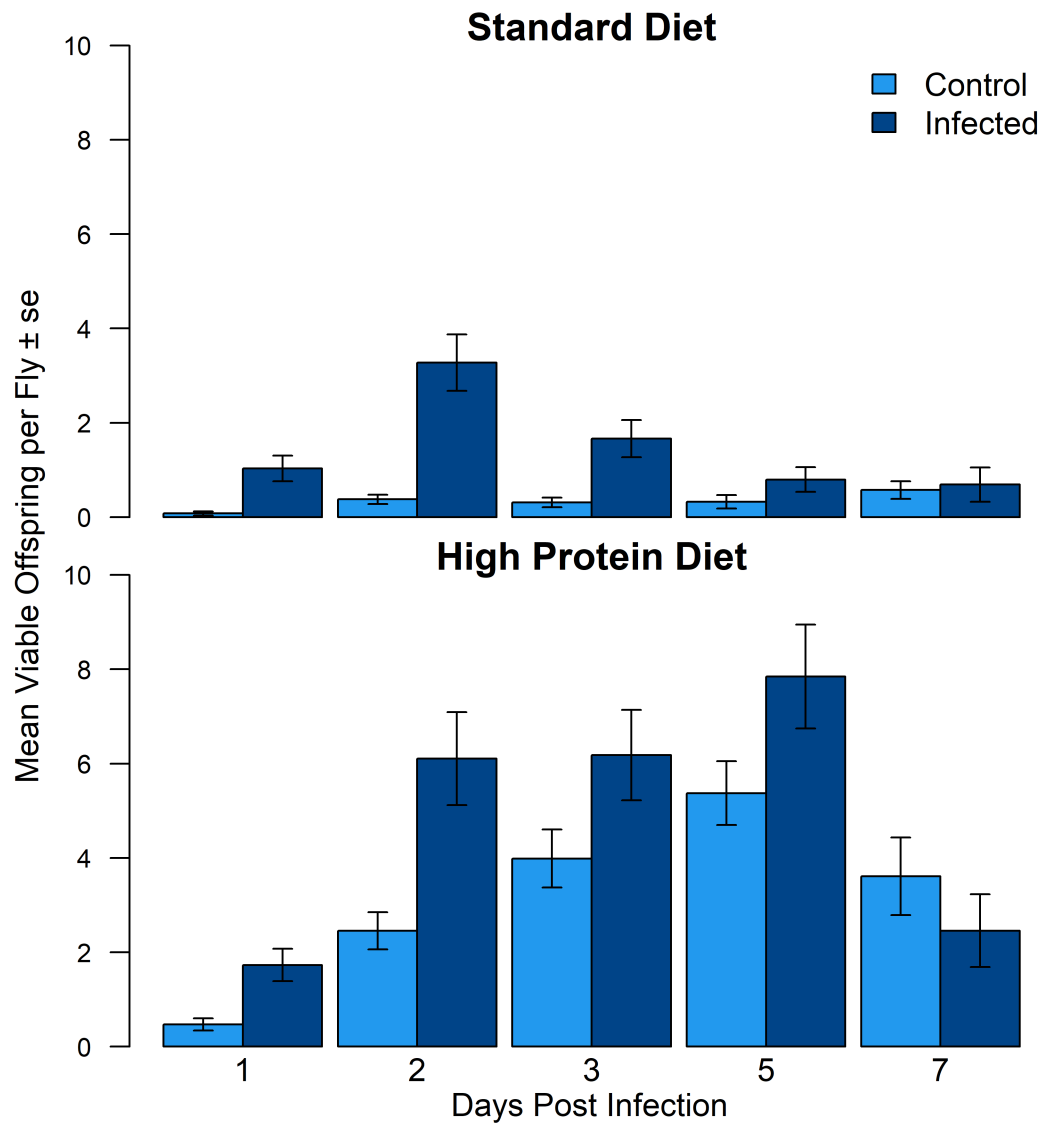

468

469 *Figure 2 Mean number of eclosed offspring per fly by control flies (light blue) and infected*  
470 *flies (dark blue) over seven days following infection on the standard Lewis diet (top) and the*  
471 *modified high protein diet (bottom).*

472

473

474 **Figure 3 - Egg-Adult Viability**

475

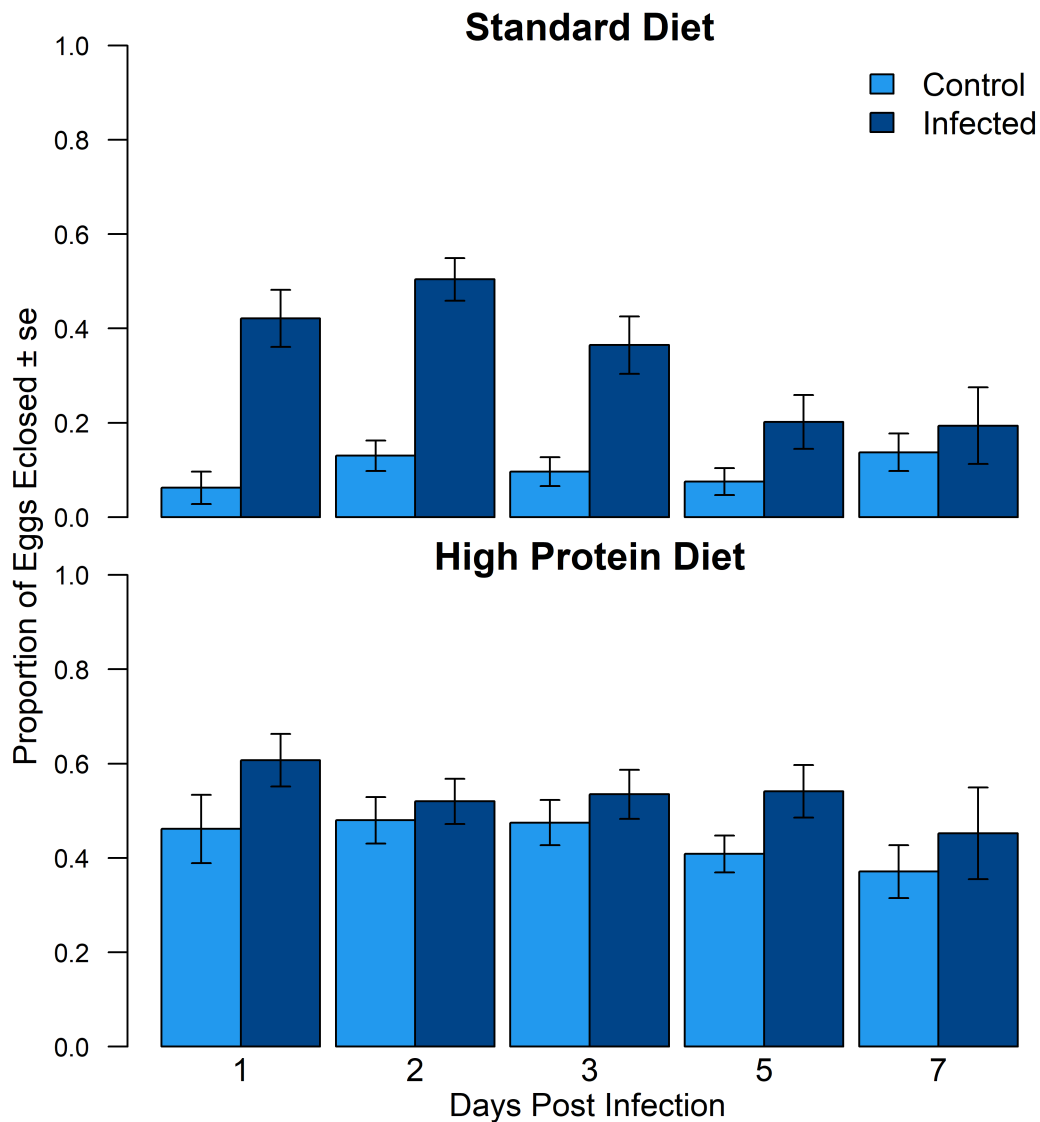

476

477 *Figure 3 Proportion of eggs which eclosed laid by control flies (light blue) and infected flies*  
478 *(dark blue) over seven days following infection on the standard Lewis diet (top) and the*  
479 *modified high protein diet (bottom).*

480

481

482

483

484

485

486

487

488

### **Supplementary Tables and Figures**

489

490 Table S1. Summary of Diets

491 Figure S1. Mean daily egg production by line, diet, and infection status.

492 Figure S2. Mean viable offspring per fly per day, by line, diet, and infection status.

493 Figure S3. Mean egg-to-adult viability by line, diet, and infection status.

494 Figure S4 – Kaplan Meier Plot of survival

495

496

497

498

499

500 Supplementary Tables and Figures

**Table S1: A comparison of the both diets with ingredients for approximately 1l of food, or enough for ~100 vials.**

|                      | Protein % | P:C ratio | Yeast (g) | Sugar (g) | Maize (g) | Agar (g) | Nipagin (ml) | Food Dye (g) | dH <sub>2</sub> O (l) |
|----------------------|-----------|-----------|-----------|-----------|-----------|----------|--------------|--------------|-----------------------|
| <b>Standard Diet</b> | 14%       | 1:6       | 18.75     | 93.75     | 69.17     | 6.87     | 15           | 0.5          | 1                     |
| <b>High Protein</b>  | 31%       | 1:2       | 49.45     | 63.05     | 69.17     | 6.87     | 15           | 0.5          | 1                     |

501

502

503

504 **Figure S1. Mean daily egg production by line, diet, and infection status.**

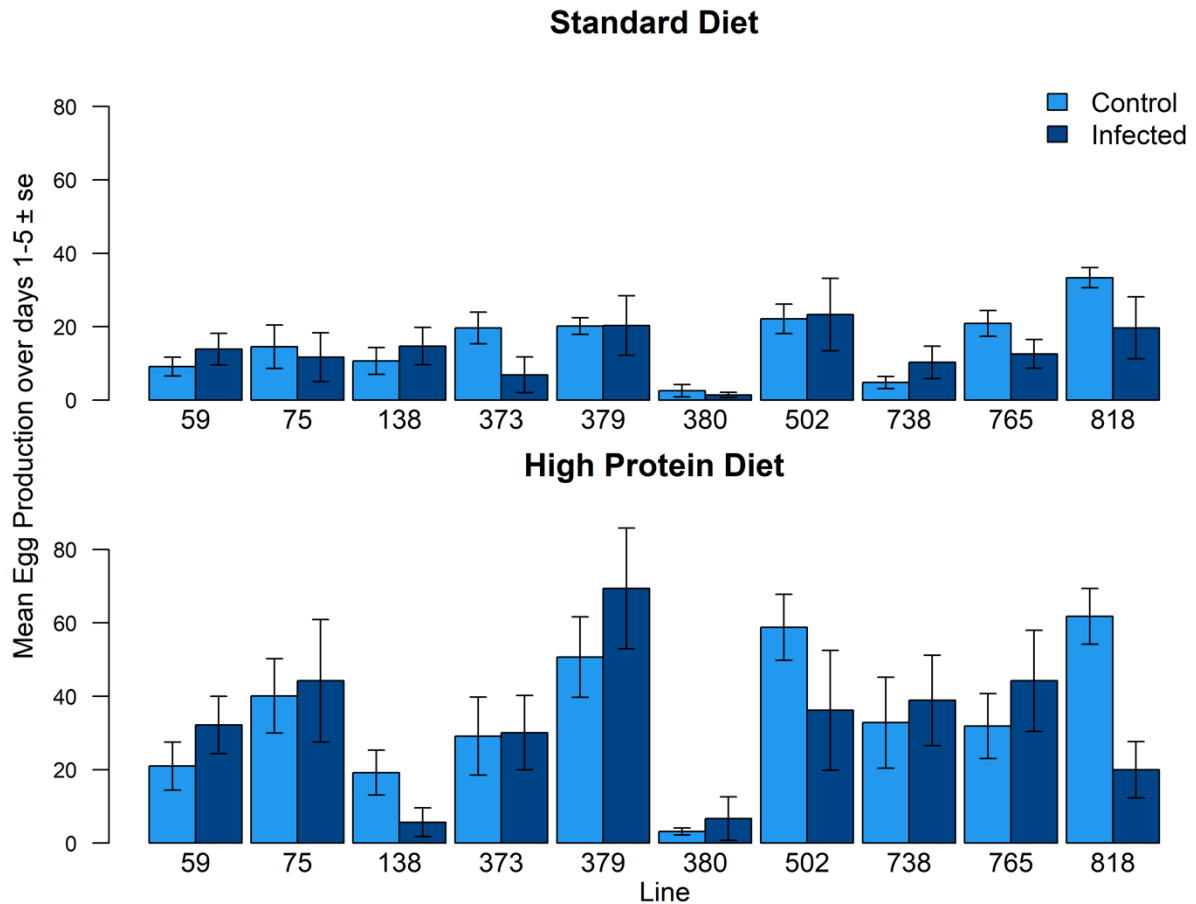

505

506 *Figure S1 Mean daily egg production per fly by control flies (light blue) and infected flies*  
507 *(dark blue) by line over the first five days following infection on the standard Lewis diet*  
508 *(above) and the modified high protein diet (below).*

509

510 **S2. Mean viable offspring per fly per day, by line, diet, and infection status.**

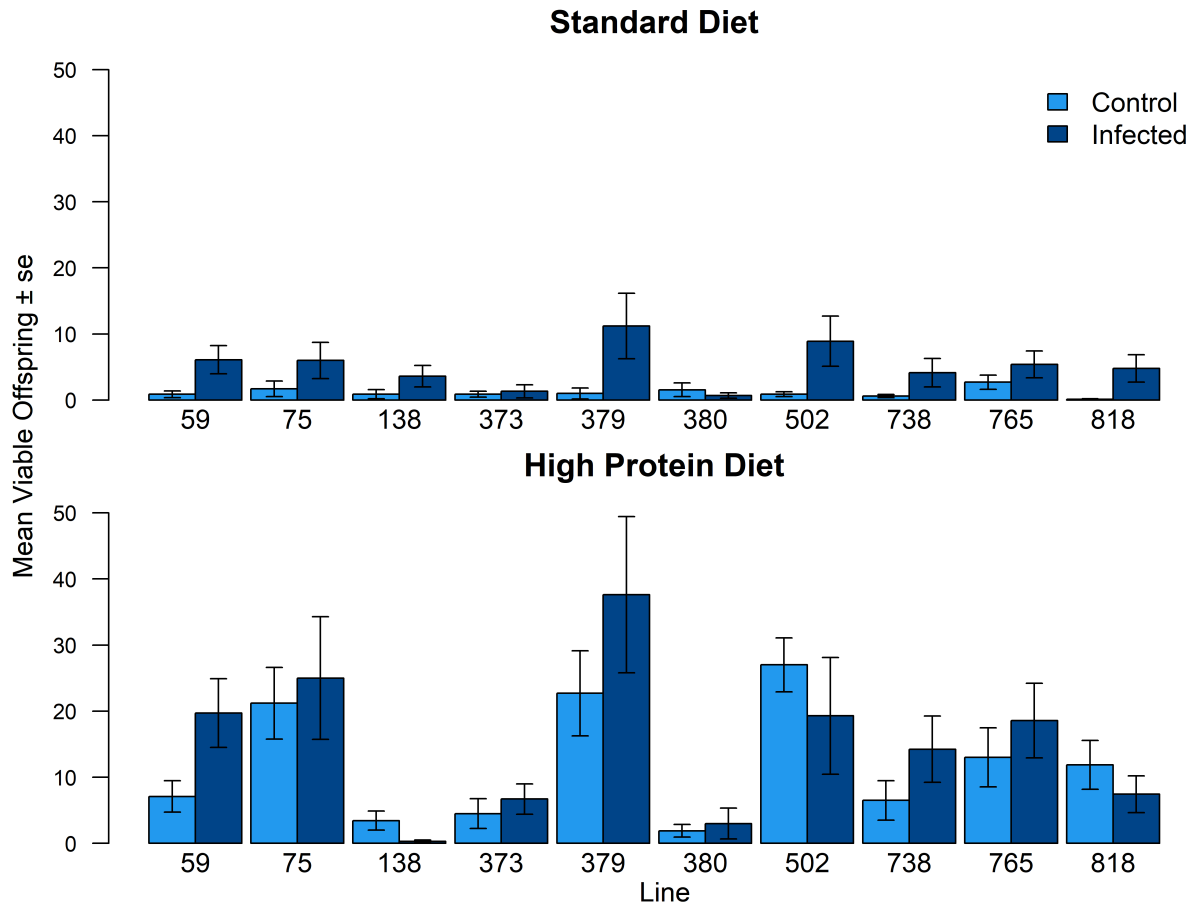

511

512 *Figure S2 Mean number of eclosed offspring produced over the first five days following*  
513 *infection per fly by control flies (light blue) and infected flies (dark blue) by line for flies on the*  
514 *standard Lewis diet (above) and the modified high protein diet (below).*

515

516

517

518

519 **Fig S3. Mean egg-to-adult viability by line, diet, and infection status.**

520

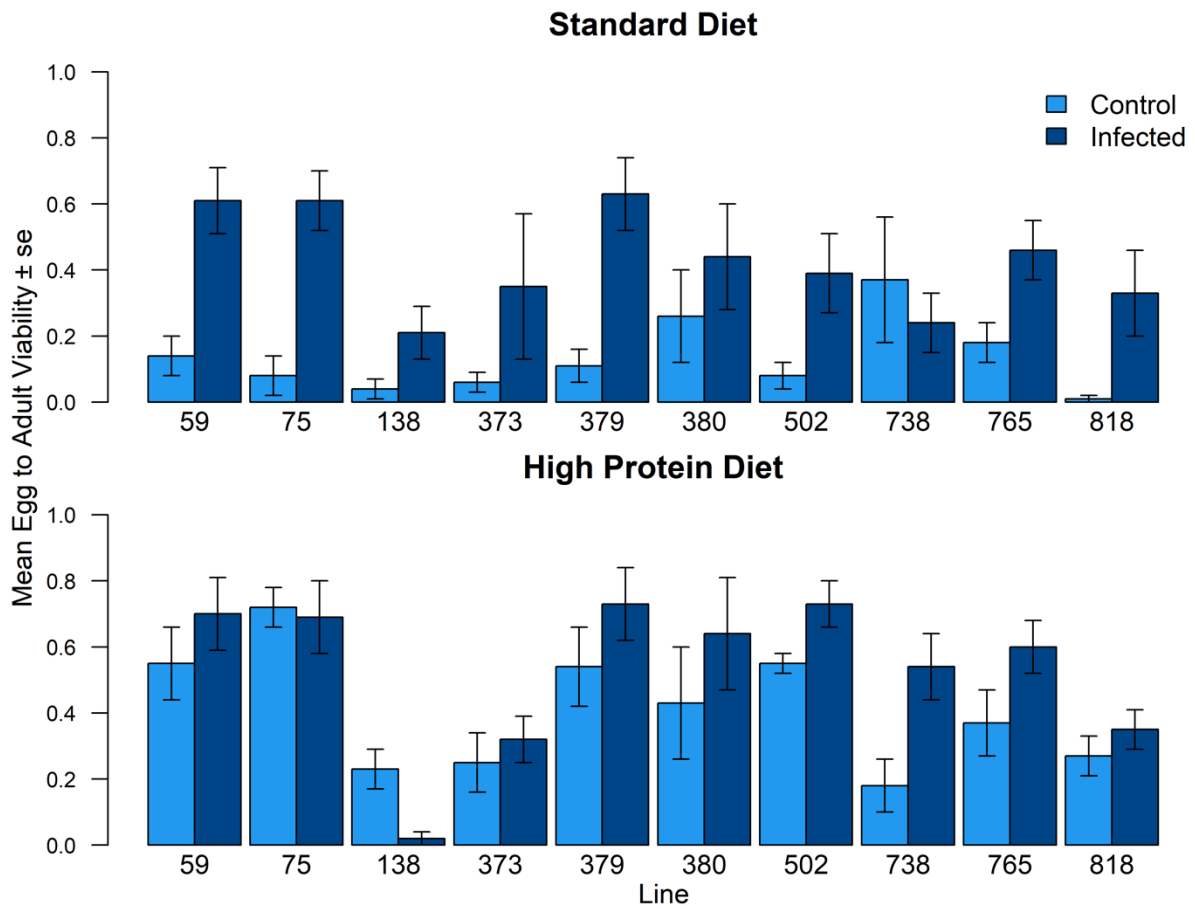

521

522 *Figure S3. Proportion of eggs laid which eclosed laid by control flies (light blue) and infected*  
523 *flies (dark blue) by line over the first five days following infection on the standard Lewis diet*  
524 *(above) and the modified high protein diet (below).*

525

526

527



528 **Figure S4 – Kaplan Meier Plot of survival**

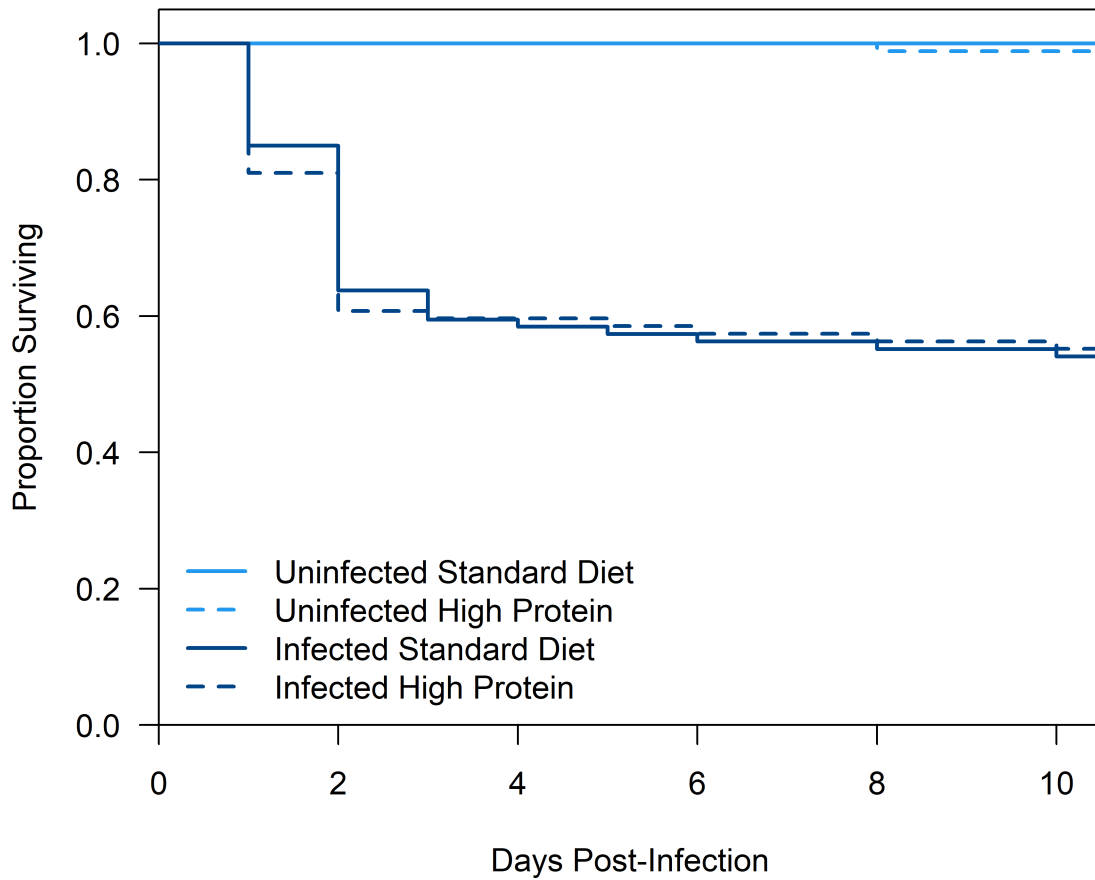

529

530 *Figure S4. Kaplan Meier plot of survival for control (light blue) and infected (dark blue) flies*  
531 *on the standard (solid line) and modified high protein (dashed line) diets over the first ten*  
532 *days following infection.*

533

534

535 **Supplementary Estimates SEs tables**

536

| <b>Egg Production</b>             | <b>Estimate (s.e.)</b> | <b>X<sup>2</sup></b> | <b>P</b> |
|-----------------------------------|------------------------|----------------------|----------|
| (Intercept)                       | -1.337 (0.339)         |                      |          |
| DietNormal                        | 0.417 (0.292)          | 17.26                | < 0.001  |
| InfectionInfected                 | 0.874 (0.282)          | 0.02                 | 0.880    |
| Day2                              | 1.516 (0.200)          |                      |          |
| Day3                              | 2.030 (0.197)          |                      |          |
| Day4                              | 2.368 (0.195)          |                      |          |
| Day5                              | 2.777 (0.194)          |                      |          |
| Day6                              | 2.548 (0.226)          |                      |          |
| Day7                              | 2.063 (0.229)          | 307.14               | < 0.001  |
| BlockB                            | 0.538 (0.152)          | 12.35                | < 0.001  |
| DietNormal:InfectionInfected      | -0.737 (0.401)         | 4.45                 | 0.035    |
| DietNormal:Day2                   | -0.612 (0.281)         |                      |          |
| DietNormal:Day3                   | -0.853 (0.278)         |                      |          |
| DietNormal:Day4                   | -0.995 (0.276)         |                      |          |
| DietNormal:Day5                   | -1.511 (0.276)         |                      |          |
| DietNormal:Day6                   | -1.054 (0.322)         |                      |          |
| DietNormal:Day7                   | -0.421 (0.324)         | 76.37                | < 0.001  |
| InfectionInfected:Day2            | -0.156 (0.274)         |                      |          |
| InfectionInfected:Day3            | -0.367 (0.280)         |                      |          |
| InfectionInfected:Day4            | -1.183 (0.284)         |                      |          |
| InfectionInfected:Day5            | -0.851 (0.278)         |                      |          |
| InfectionInfected:Day6            | -0.723 (0.333)         |                      |          |
| InfectionInfected:Day7            | -2.027 (0.362)         | 75.23                | < 0.001  |
| DietNormal:InfectionInfected:Day2 | 0.281 (0.391)          |                      |          |
| DietNormal:InfectionInfected:Day3 | -0.067 (0.404)         |                      |          |
| DietNormal:InfectionInfected:Day4 | 0.063 (0.413)          |                      |          |
| DietNormal:InfectionInfected:Day5 | 0.077 (0.408)          |                      |          |
| DietNormal:InfectionInfected:Day6 | -0.371 (0.492)         |                      |          |
| DietNormal:InfectionInfected:Day7 | 0.903 (0.511)          | 6.88                 | 0.330    |

537

538

| <b>Number of Viable Offspring</b> | <b>Estimate (s.e.)</b> | <b>X<sup>2</sup></b> | <b>P</b> |
|-----------------------------------|------------------------|----------------------|----------|
| (Intercept)                       | -2.435 (0.369)         |                      |          |
| DietNormal                        | -1.758 (0.558)         | 53.04                | <0.0001  |
| InfectionInfected                 | 1.377 (0.368)          | 30.41                | <0.0001  |
| Day2                              | 1.778 (0.287)          |                      |          |
| Day3                              | 2.260 (0.283)          |                      |          |
| Day5                              | 2.760 (0.280)          |                      |          |
| Day7                              | 2.002 (0.334)          | 123.60               | <0.0001  |
| BlockB                            | 0.253 (0.194)          | 1.71                 | 0.190    |
| DietNormal:InfectionInfected      | 1.092 (0.656)          | 6.54                 | 0.011    |
| DietNormal:Day2                   | -0.090 (0.587)         |                      |          |
| DietNormal:Day3                   | -0.886 (0.600)         |                      |          |
| DietNormal:Day5                   | -1.534 (0.611)         |                      |          |
| DietNormal:Day7                   | -0.056 (0.660)         | 43.22                | <0.0001  |

|                                    |                |       |         |
|------------------------------------|----------------|-------|---------|
| InfectionInfected:Day2             | -0.472 (0.376) |       |         |
| InfectionInfected:Day3             | -0.862 (0.386) |       |         |
| InfectionInfected:Day5             | -1.109 (0.384) |       |         |
| InfectionInfected:Day7             | -2.089 (0.507) | 37.12 | <0.0001 |
| DietNormal:InfectionInfected:Day 2 | 0.153 (0.689)  |       |         |
| DietNormal:InfectionInfected:Day 3 | -0.005 (0.722) |       |         |
| DietNormal:InfectionInfected:Day 5 | -0.458 (0.749) |       |         |
| DietNormal:InfectionInfected:Day 7 | -0.499 (0.894) | 1.39  | 0.850   |

539  
540  
541

| <b>Egg-Adult Viability</b>        | <b>Estimate (s.e.)</b> | <b>X2</b> | <b>P</b> |
|-----------------------------------|------------------------|-----------|----------|
| (Intercept)                       | 0.116 (0.389)          |           |          |
| InfectionInfected                 | 0.603 (0.350)          | 40.00     | <0.0001  |
| Day2                              | -0.238 (0.281)         |           |          |
| Day3                              | -0.041 (0.273)         |           |          |
| Day5                              | -0.350 (0.276)         |           |          |
| Day7                              | -0.329 (0.300)         | 61.69     | <0.0001  |
| DietNormal                        | -3.183 (0.558)         | 73.55     | <0.0001  |
| BlockB                            | -0.556 (0.167)         | 13.06     | <0.001   |
| InfectionInfected:Day2            | -0.077 (0.331)         |           |          |
| InfectionInfected:Day3            | -0.309 (0.329)         |           |          |
| InfectionInfected:Day5            | -0.067 (0.324)         |           |          |
| InfectionInfected:Day7            | -0.593 (0.406)         | 23.12     | <0.001   |
| InfectionInfected:DietNormal      | 2.677 (0.638)          | 24.99     | <0.0001  |
| Day2:DietNormal                   | 1.373 (0.580)          |           |          |
| Day3:DietNormal                   | 0.509 (0.588)          |           |          |
| Day5:DietNormal                   | 0.454 (0.591)          |           |          |
| Day7:DietNormal                   | 1.289 (0.625)          | 65.52     | <0.0001  |
| InfectionInfected:Day2:DietNormal | -0.717 (0.646)         |           |          |
| InfectionInfected:Day3:DietNormal | -0.804 (0.659)         |           |          |
| InfectionInfected:Day5:DietNormal | -1.792 (0.676)         |           |          |
| InfectionInfected:Day7:DietNormal | -2.749 (0.777)         | 22.37     | <0.001   |

542  
543  
544
